# Supplementary material for: Zwei Jahre Pilotphase Gemeindenotfallsanitäter in der Region Oldenburg (Niedersachsen)
Source: Springer Nature journal article supplement (doi:10.1007/s10049-022-01079-9), 2022-09-30
Supplement: MOESM1 [file 23558208]

**Zusatzmaterial zum Beitrag** „Zwei Jahre Pilotphase Gemeindenotfallsanitäter in der Region Oldenburg (Niedersachsen)“ von Sommer A, Rehbock C, Seeger, I et al. (2022) in *Notfall+Rettungsmedizin*

Beitrag und Zusatzmaterial stehen Ihnen auf [www.springermedizin.de](http://www.springermedizin.de) zur Verfügung. Bitte geben Sie dort den Beitragstitel in die Suche ein.

## Interview-Leitfaden G-NFS Fokusgruppen-Interviews

- Vorstellung von Befragenden
- Vorstellungsrunde G-NFS
  - mit Frage nach initialer Motivation am Projekt teilzunehmen
  - Wie lange seid Ihr schon G-NFS? Würdet Ihr es nochmal machen?
  - Weitere Tätigkeit im Rettungsdienst?
  - Veränderungen in der Prozentzahl der Beschäftigung?
- Resumé nach 2 Jahren Tätigkeit?
  - Hat sich die Tätigkeit bzw. die Organisation verändert?
  - Wie ist Eure Wahrnehmung zu der Tätigkeit?
    - Gleiches Empfinden wie vor 2 Jahren? Immer noch zufrieden?
- Nennt 3-5 positive und 3-5 negative Punkte zum G-NFS
- Wie gut fühlt Ihr euch durch die schulische Ausbildung auf die Tätigkeiten als G-NFS vorbereitet?
  - Was müsste sich an dem Konzept an sich und der Aus- bzw. Weiterbildung geändert werden, um die Umsetzung zu verbessern?
  - Gibt es ausreichend Fortbildungsmöglichkeiten?
- Welche Schwierigkeiten sind Euch in Einsätzen begegnet?
  - Welchen Unterstützungsbedarf gibt es?
- Wie ist die Kommunikation mit der Leitstelle? Habt Ihr den Eindruck, dass Euch die Leitstelle mit der Zeit anders disponiert?
  - Gab es für Euch die Möglichkeit bei der Leitstelle zu hospitieren?
  - Gab es für Leitstellendisponenten die Möglichkeit bei Euch zu hospitieren?
- Welche Einsätze begegnen Euch besonders oft? Kamen bestimmte Diagnosen besonders häufig vor?
- Welche Maßnahmen ergreift Ihr besonders oft (auch pflegerische Tätigkeiten)?
- Wie passend sind die G-NFS-Algorithmen?
  - Wurden diese nach Eurem Feedback angepasst?
- Wie oft werden vor Ort andere Ressourcen oder Dienste benötigt (inkl. RTW/NEF)?
- Wie funktioniert die Zusammenarbeit mit anderen Diensten?
  - Wovon profitiert die Zusammenarbeit (Praktikum dort, Informationsaustausch etc.)?
  - Wie oft besteht der Kontakt zu anderen Diensten im Einsatz?
- Wie bewertet Ihr die telemedizinische Anbindung?
  - Würdet Ihr euch wünschen, dass es die Möglichkeit gibt im Telemedizin-Zentrum zu hospitieren?
- Wie bewertet Ihr das Einsatzprotokoll / Zusatzprotokoll?
- Habt ihr ‚Dauer-Patienten‘, zu denen Ihr öfter fahrt?
  - Wieso landen diese Patienten immer wieder bei der 112?
- Wie ist Eure Sicht auf First-Responder Einsätze?

- Wie bewertet Ihr die Eigensicherheit der G-NFS?
- Denkt Ihr, dass auch andere Einsatzszenarien durch den G-NFS abgearbeitet werden könnten? Wenn ja, welche wären das?
  - Wie fändet Ihr es auch ORGL-Aufgaben zu übernehmen als G-NFS?
- Gibt es eine bestimmte Struktur unter euch G-NFS?
  - Beispiele: Sprecher der regionalen Gruppe oder regelmäßige G-NFS Gruppentreffen für den gemeinsamen Austausch?
  - Gibt es Ansprechpartner für psychologische Unterstützung (intern/extern)?
  - Wie wird Euer Feedback weitergeleitet? (Struktur der Organisation und Zusammenarbeit / Kommunikation)

### **Corona-Pandemie**

- Wie hat sich Eure Tätigkeit in der Corona-Pandemie verändert?
  - Wie wurden neue Informationen kommuniziert und Veränderungen organisiert?
  - Gab es dadurch für Euch mehr (andere) Einsätze?
  - Wurdet Ihr als erste rettungsdienstliche Instanz zu Notrufpatienten gesendet, um die Notwendigkeit für einen Transport ins Krankenhaus zu überprüfen?
    - Wenn ja, wie ist das erfolgt? Gab es eine bestimmte Verfahrensanweisung / Checkliste?
    - Konntet ihr unnötige Infektionstransporte ins KH vermeiden?
  - Welchen Mehraufwand hatten diese Einsätze?
  - Welche Aufgaben und Maßnahmen ergreift Ihr in diesen Einsätzen am meisten?
- Wie beurteilt Ihr den Nutzen des G-NFS in der Pandemie?
  - Konntet Ihr bei Covid-positiven Patienten, die bereits im Vorfeld Kontakt zu einem Rettungsmittel hatten, effektive Maßnahmen zur Versorgung durchführen?

### **Zukunftsperspektive**

- Wo seht Ihr die Perspektive des G-NFS? Kennt Ihr andere Konzepte / Systeme?
  - Was sind Konsequenzen für das Berufsbild und die Systemausgestaltung (NFS / G-NFS / andere Konzepte)?
- Gibt es noch spezifische Änderungswünsche / Optimierungsvorschläge?

# Fragen für Zoom-Umfragen

## **Umfrage 1: Kommunikation**

1. Unter Berücksichtigung aller Aspekte: wie bewertet Ihr die Gesamtzufriedenheit mit Eurer Tätigkeit als G-NFS?
  - 1: sehr gut
  - 2: gut
  - 3: befriedigend
  - 4: ausreichend
  - 5: mangelhaft
  - 6: ungenügend
2. Unter Berücksichtigung aller Aspekte: wie bewertet Ihr Eure Zufriedenheit in der Zusammenarbeit mit der Leitstelle?
  - 1: sehr gut
  - 2: gut
  - 3: befriedigend
  - 4: ausreichend
  - 5: mangelhaft
  - 6: ungenügend
3. Unter Berücksichtigung aller Aspekte: wie bewertet Ihr Eure Zufriedenheit in der Zusammenarbeit mit dem übrigen Rettungsdienst?
  - 1: sehr gut
  - 2: gut
  - 3: befriedigend
  - 4: ausreichend
  - 5: mangelhaft
  - 6: ungenügend
4. Unter Berücksichtigung aller Aspekte: wie bewertet Ihr Eure Zufriedenheit in der Zusammenarbeit mit der Telemedizin?
  - 1: sehr gut
  - 2: gut
  - 3: befriedigend
  - 4: ausreichend
  - 5: mangelhaft
  - 6: ungenügend
  - Keine Erfahrung / nicht zutreffend
5. Unter Berücksichtigung aller Aspekte: wie bewertet Ihr Eure Zufriedenheit in der Zusammenarbeit mit den Hausärzten?
  - 1: sehr gut
  - 2: gut
  - 3: befriedigend
  - 4: ausreichend
  - 5: mangelhaft
  - 6: ungenügend
  - Keine Erfahrung / nicht zutreffend
6. Unter Berücksichtigung aller Aspekte: wie bewertet Ihr Eure Zufriedenheit in der Zusammenarbeit mit den Pflegediensten oder sonstigen Diensten?

- 1: sehr gut
- 2: gut
- 3: befriedigend
- 4: ausreichend
- 5: mangelhaft
- 6: ungenügend
- Keine Erfahrung / nicht zutreffend

### ***Umfrage 2: Sicherheit***

Unter Berücksichtigung, dass die meisten Einsätze als Einzelperson durchgeführt werden:  
Wie bewertet Ihr die persönliche Sicherheit im Einsatz?

- 1: sehr gut
- 2: gut
- 3: befriedigend
- 4: ausreichend
- 5: mangelhaft
- 6: ungenügend

### ***Umfrage 3: Überführung in Regelversorgung***

Unter Berücksichtigung der bisherigen Erfahrungen im Einsatzdienst als G-NFS während der Versuchs- und Pilotphase: Wie bewertet Ihr die Überführung des Pilotprojektes G-NFS in eine Regelversorgung in der Zukunft?

- 1: sehr gut
- 2: gut
- 3: befriedigend
- 4: ausreichend
- 5: mangelhaft
- 6: ungenügend

**Tabelle S-1. Kode-Manager mit Codegruppen und Häufigkeit der einzelnen Codes in Atlas.ti**

| Farbe | Name                                         | Häufigkeit | Gruppen                                                           |
|-------|----------------------------------------------|------------|-------------------------------------------------------------------|
| ●     | alleine arbeiten                             | 14         | Gesamtsystemauswertung                                            |
| ●     | anderer Dienst benötigt                      | 2          | Gesamtsystemauswertung                                            |
| ●     | Dauer-Patienten / frequent flyer             | 8          | Gesamtsystemauswertung                                            |
| ●     | First Responder Einsätze                     | 10         | Gesamtsystemauswertung                                            |
| ●     | G-NFS als sinnvolle Erweiterung des RD       | 13         | Gesamtsystemauswertung                                            |
| ●     | Sicherheit (eigene)                          | 11         | Gesamtsystemauswertung                                            |
| ●     | Telemedizin                                  | 15         | Gesamtsystemauswertung                                            |
| ●     | Zusammenarbeit andere Dienste                | 5          | Gesamtsystemauswertung                                            |
| ●     | Zusammenarbeit HA                            | 9          | Gesamtsystemauswertung                                            |
| ●     | Zusammenarbeit KH                            | 4          | Gesamtsystemauswertung                                            |
| ●     | Zusammenarbeit KV                            | 12         | Gesamtsystemauswertung                                            |
| ●     | Zusammenarbeit Leitstelle                    | 42         | Gesamtsystemauswertung                                            |
| ●     | Zusammenarbeit Leitstelle Vechta             | 9          | Gesamtsystemauswertung                                            |
| ●     | Überführung Pilotprojekt in Regelversorgung  | 10         | Zukunftsperspektiven G-NFS                                        |
| ●     | Zukunft - Vorschläge von G-NFS               | 12         | Zukunftsperspektiven G-NFS                                        |
| ●     | Zukunft - andere Einsatzszenarien / Aufgaben | 27         | Zukunftsperspektiven G-NFS                                        |
| ●     | Zukunft - andere Konzepte / Systeme          | 7          | Zukunftsperspektiven G-NFS                                        |
| ●     | Corona-Pandemie: G-NFS für Sichtung /        | 8          | Veränderungen Corona-Pandemie                                     |
| ●     | Corona-Pandemie: Veränderungen               | 19         | Veränderungen Corona-Pandemie                                     |
| ●     | Motivation                                   | 13         | allgemeines eigenes Resümee nach 2 Jahren                         |
| ●     | Probleme / Schwierigkeiten                   | 12         | allgemeines eigenes Resümee nach 2 Jahren, Gesamtsystemauswertung |
| ●     | Resümee allgemein zum GNFS                   | 41         | allgemeines eigenes Resümee nach 2 Jahren, Gesamtsystemauswertung |
| ●     | Resümee negativ                              | 29         | allgemeines eigenes Resümee nach 2 Jahren, Gesamtsystemauswertung |
| ●     | Resümee positiv                              | 31         | allgemeines eigenes Resümee nach 2 Jahren, Gesamtsystemauswertung |
| ●     | Beispiel / Einsatz                           | 5          | Sonstiges                                                         |
| ●     | Einschätzung GNFS                            | 11         | Sonstiges                                                         |
| ●     | Sonstiges / Wichtiges                        | 5          | Sonstiges                                                         |

**Tabelle S-2. Ergebnisse der Online-Umfrage für den Bereich GOL (N=12)**

|                                                                                                                                     | Sehr Gut<br>(1) | Gut<br>(2) | Befriedigend<br>(3) | Ausreichend<br>(4) | Mangelhaft<br>(5) | Ungenügend<br>(6) | k.A. / nicht<br>zutreffend | Durchschnitt |
|-------------------------------------------------------------------------------------------------------------------------------------|-----------------|------------|---------------------|--------------------|-------------------|-------------------|----------------------------|--------------|
| <b>Gesamtzufriedenheit mit der Tätigkeit als Gemeindenotfallsanitäter</b>                                                           | 3               | 3          | 4                   | 2                  | 0                 | 0                 | 0                          | 2,42         |
| <b>Zufriedenheit in der Zusammenarbeit mit der Leitstelle</b>                                                                       | 1               | 0          | 3                   | 4                  | 4                 | 0                 | 4                          | 3,83         |
| <b>Zufriedenheit in der Zusammenarbeit mit dem übrigen Rettungsdienst</b>                                                           | 3               | 7          | 2                   | 0                  | 0                 | 0                 | 0                          | 2,00         |
| <b>Zufriedenheit in der Zusammenarbeit mit den Hausärzten</b>                                                                       | 3               | 3          | 3                   | 2                  | 0                 | 0                 | 1                          | 2,36         |
| <b>Zufriedenheit in der Zusammenarbeit mit den Pflegediensten oder sonstigen Diensten</b>                                           | 1               | 4          | 4                   | 1                  | 1                 | 0                 | 1                          | 2,73         |
| <b>Unter bisheriger Erfahrung als G-NFS: Bewertung der Überführung des Pilotprojektes G-NFS in eine Regelversorgung der Zukunft</b> | 7               | 3          | 1                   | 1                  | 0                 | 0                 | 0                          | 1,67         |

**Tabelle S-3. Ergebnisse der Online-Umfrage für den Bereich Vechta (N=4)**

|                                                                                                                                     | Sehr Gut<br>(1) | Gut<br>(2) | Befriedigend<br>(3) | Ausreichend<br>(4) | Mangelhaft<br>(5) | Ungenügend<br>(6) | k.A. / nicht<br>zutreffend | Durchschnitt |
|-------------------------------------------------------------------------------------------------------------------------------------|-----------------|------------|---------------------|--------------------|-------------------|-------------------|----------------------------|--------------|
| <b>Gesamtzufriedenheit mit der Tätigkeit als Gemeindenotfallsanitäter</b>                                                           | 0               | 3          | 1                   | 0                  | 0                 | 0                 | 0                          | 2,25         |
| <b>Zufriedenheit in der Zusammenarbeit mit der Leitstelle</b>                                                                       | 1               | 2          | 1                   | 0                  | 0                 | 0                 | 0                          | 2,00         |
| <b>Zufriedenheit in der Zusammenarbeit mit dem übrigen Rettungsdienst</b>                                                           | 1               | 2          | 1                   | 0                  | 0                 | 0                 | 0                          | 2,00         |
| <b>Zufriedenheit in der Zusammenarbeit mit den Hausärzten</b>                                                                       | 0               | 4          | 0                   | 0                  | 0                 | 0                 | 0                          | 2,00         |
| <b>Zufriedenheit in der Zusammenarbeit mit den Pflegediensten oder sonstigen Diensten</b>                                           | 1               | 1          | 2                   | 0                  | 0                 | 0                 | 0                          | 2,25         |
| <b>Unter bisheriger Erfahrung als G-NFS: Bewertung der Überführung des Pilotprojektes G-NFS in eine Regelversorgung der Zukunft</b> | 3               | 0          | 1                   | 0                  | 0                 | 0                 | 0                          | 1,50         |

**Tabelle S-4. Auswahl von Zitaten der Wortwolke**

| Wörter aus Wortwolke (Auswahl)                                               | Zitate (Auswahl)                                                                                                                                                                                                                                                                                                                                                                                                                                                                                                                                                                                                                                                                                                                                                                                                                                                                                                                               |
|------------------------------------------------------------------------------|------------------------------------------------------------------------------------------------------------------------------------------------------------------------------------------------------------------------------------------------------------------------------------------------------------------------------------------------------------------------------------------------------------------------------------------------------------------------------------------------------------------------------------------------------------------------------------------------------------------------------------------------------------------------------------------------------------------------------------------------------------------------------------------------------------------------------------------------------------------------------------------------------------------------------------------------|
| Projekt, Idee, Patient, angemessen, super, effektiv, abzupuffern, begeistern | „[Ich] habe mich sehr auf dieses <b>Projekt</b> gefreut und stehe zu 100% hinter diesem Projekt. Ich bin von dem Projekt als solches, von dieser <b>Idee</b> , dass [...] derjenige, der die höchste nicht ärztliche medizinische Ausbildung hat bei niederschweligen Notfalleinsätzen zum Einsatzort fährt und sich dort noch mal einen Blick über den <b>Patienten</b> und die Situation verschafft und dann nochmal zu gucken, muss der Patient jetzt überhaupt hospitalisiert werden und wenn ja, dann sogar noch ein adäquates oder <b>angemessenes</b> Rettungsmittel auszusuchen, muss ja nicht immer der Rettungswagen sein, kann ja auch ein Krankentransportwagen oder sogar ein Taxi sein, je nachdem ... finde ich eine <b>super</b> Idee und die Praxis zeigt auch, dass das ein unheimlich <b>effektiver</b> Weg ist, um eben diese Art von Einsätzen <b>abzupuffern</b> . Also ich bin hochgradig <b>begeistert</b> davon.“ (A) |
| Berufsbild, Zukunft                                                          | „Das ist absolut meiner Meinung nach ein <b>Berufsbild</b> mit großem Potential für die <b>Zukunft</b> .“ (A)                                                                                                                                                                                                                                                                                                                                                                                                                                                                                                                                                                                                                                                                                                                                                                                                                                  |
| Zeit, Patient                                                                | „Was mir persönlich gefällt, das ist die lange <b>Zeit</b> mit den <b>Patienten</b> . Also die bringt mir persönlich ganz, ganz viel. Also dass ich nicht unter diesem Zeitdruck stehe wie im Rettungsdienst, also wie in der Notfallrettung.“ (C)                                                                                                                                                                                                                                                                                                                                                                                                                                                                                                                                                                                                                                                                                             |
| lösen, Problem                                                               | „Wir <b>lösen Probleme</b> , und die sind unterschiedlichster Couleur, für den Außenstehenden oft mit einem Lächeln abgetan. Aber für die Menschen sind’s eben Probleme. Und das macht so wahnsinnig viel <b>Spaß</b> , in dieser Vielfältigkeit zu schwimmen und nach einer <b>Lösung</b> zu suchen, mit der alle leben können.“ (B)                                                                                                                                                                                                                                                                                                                                                                                                                                                                                                                                                                                                          |
| Empathie                                                                     | „Es [hat] eben viel damit zu tun [...], mit zuhören, ja, vor allen Dingen Zuhören und <b>Empathie</b> .“ (B)                                                                                                                                                                                                                                                                                                                                                                                                                                                                                                                                                                                                                                                                                                                                                                                                                                   |
| positiv, alleine, Mensch                                                     | „Also für mich <b>positiv</b> ist..., dass ich <b>alleine</b> arbeiten kann für mich, dass ich den <b>Menschen</b> , die hier ein Hilfersuchen haben, mit anderen Mitteln helfen kann. Und wir können was verändern, das ist das <b>Positive</b> .“ (A)                                                                                                                                                                                                                                                                                                                                                                                                                                                                                                                                                                                                                                                                                        |
| Erfahrung, helfen, Berufsbild                                                | „Ich würde das gerne zu 100 Prozent machen. Denn wenn man so überlegt, ich bin seit über 30 Jahren im Rettungsdienst und durch die ganze <b>Erfahrung</b> , die man dann mitbringt und sieht, wie die Leute, die man dann zuhause lässt, glücklich sind, dass sie zu Hause bleiben können, dass man hier <b>geholfen</b> hat. Hat das für so einen Retter wie mich und auch vielleicht auch für meine Kollegen immer so ein Stück Glücksgefühl und deswegen bin ich der Meinung, bring das schon sehr viel, wenn es demnächst ein <b>Berufsbild</b> wird, was etabliert ist.“ (C)                                                                                                                                                                                                                                                                                                                                                              |
| positiv, Feedback, dankbar                                                   | „Das, was man aber sagen kann, bei den Patienten oder Pflegeeinrichtungen etc., wo man auftaucht, hat man sehr viel <b>positives Feedback</b> bekommen und die sind auch sehr <b>dankbar</b> . Also die Altenheime oder Pflegeeinrichtungen, die uns angerufen haben [...], die rufen auch noch mal wieder an, weil die merken, hey, das ist genau das, was wir brauchen. Gerade am Ende oder in der Nacht, wenn jetzt der kassenärztliche Bereitschaftsdienst nicht in der Lage ist rauszukommen oder der Hausarzt nicht erreichbar ist, das ist auf jeden Fall sehr <b>positiv</b> .“ (D)                                                                                                                                                                                                                                                                                                                                                    |
